# Supplementary material for: Prevalence and Time Trends of Self-Reported Mental Health Problems Among Children and Adolescents Between 11 and 17 Years in the KiGGS Study
Source: Atypon-hosted journal article supplement (doi:10.1024/1422-4917/a000936), 2023-07-01
Supplement: 1422-4917_a000936_esm1.pdf [file 1422-4917_a000936_esm1.pdf]

## Electronic Supplementary Material

ESM 1. Mean values, standard deviations and the 95% confidence intervals of the SDQ total difficulties score and the SDQ subscales in the KiGGS baseline study and KiGGS wave 2 separated for gender and age.

|                           |              | KiGGS baseline study |             |                    | KiGGS wave 2 |             |                   |
|---------------------------|--------------|----------------------|-------------|--------------------|--------------|-------------|-------------------|
|                           |              | <i>M</i>             | <i>SE</i>   | <i>95 % - CI</i>   | <i>M</i>     | <i>SE</i>   | <i>95 % - CI</i>  |
| <b>SDQ Total</b>          | <b>Total</b> | <b>10,08</b>         | <b>0,06</b> | <b>9,95–10,22</b>  | <b>9,70</b>  | <b>0,08</b> | <b>9,53–9,86</b>  |
| <b>Difficulties</b>       | <b>Girls</b> | <b>10,54</b>         | <b>0,10</b> | <b>10,35–10,73</b> | <b>10,18</b> | <b>0,11</b> | <b>9,96–10,40</b> |
| <b>Score</b>              | 11 years     | 9,87                 | 0,26        | 9,36–10,38         | 9,92         | 0,37        | 9,19–10,65        |
|                           | 12 years     | 10,27                | 0,27        | 9,74–10,8          | 9,40         | 0,24        | 8,91–9,88         |
|                           | 13 years     | 10,22                | 0,26        | 9,70–10,73         | 9,20         | 0,25        | 8,71–9,70         |
|                           | 14 years     | 10,86                | 0,26        | 10,34–11,38        | 10,63        | 0,30        | 10,04–11,22       |
|                           | 15 years     | 10,93                | 0,25        | 10,44–11,42        | 10,67        | 0,31        | 10,05–11,28       |
|                           | 16 years     | 10,76                | 0,25        | 10,26–11,26        | 10,91        | 0,32        | 10,28–11,55       |
|                           | 17 years     | 10,77                | 0,31        | 10,17–11,37        | 10,34        | 0,30        | 9,75–10,94        |
|                           | <b>Boys</b>  | <b>9,66</b>          | <b>0,08</b> | <b>9,49–9,82</b>   | <b>9,23</b>  | <b>0,12</b> | <b>9,00–10,13</b> |
|                           | 11 years     | 9,65                 | 0,27        | 9,11–10,19         | 10,32        | 0,36        | 9,61–11,03        |
|                           | 12 years     | 9,92                 | 0,26        | 9,42–10,43         | 8,67         | 0,27        | 8,13–9,20         |
|                           | 13 years     | 9,79                 | 0,24        | 9,31–10,27         | 9,49         | 0,32        | 8,85–10,13        |
|                           | 14 years     | 9,61                 | 0,23        | 9,15–10,06         | 9,28         | 0,28        | 8,73–9,83         |
|                           | 15 years     | 9,38                 | 0,18        | 9,02–9,74          | 8,79         | 0,26        | 8,28–9,30         |
|                           | 16 years     | 9,51                 | 0,26        | 9,01–10,02         | 9,04         | 0,24        | 8,56–9,52         |
|                           | 17 years     | 9,75                 | 0,24        | 9,29–10,22         | 9,12         | 0,31        | 8,50–9,74         |
| <b>Emotional symptoms</b> | <b>Total</b> | <b>2,45</b>          | <b>0,03</b> | <b>2,40–2,51</b>   | <b>2,62</b>  | <b>0,03</b> | <b>2,55–2,69</b>  |
|                           | <b>Girls</b> | <b>2,98</b>          | <b>0,04</b> | <b>2,90–3,07</b>   | <b>3,30</b>  | <b>0,05</b> | <b>3,20–3,39</b>  |
|                           | 11 years     | 2,37                 | 0,09        | 2,19–2,55          | 2,61         | 0,11        | 2,38–2,84         |
|                           | 12 years     | 2,70                 | 0,10        | 2,49–2,90          | 2,80         | 0,11        | 2,58–3,01         |
|                           | 13 years     | 2,53                 | 0,11        | 2,31–2,75          | 2,74         | 0,14        | 2,46–3,01         |
|                           | 14 years     | 3,01                 | 0,11        | 2,79–3,23          | 3,43         | 0,12        | 3,19–3,66         |
|                           | 15 years     | 3,38                 | 0,11        | 3,16–3,60          | 3,77         | 0,14        | 3,50–4,04         |
|                           | 16 years     | 3,37                 | 0,12        | 3,14–3,61          | 3,85         | 0,15        | 3,55–4,14         |
|                           | 17 years     | 3,39                 | 0,14        | 3,11–3,67          | 3,70         | 0,15        | 3,40–4,01         |
|                           | <b>Boys</b>  | <b>1,96</b>          | <b>0,03</b> | <b>1,90–2,02</b>   | <b>1,97</b>  | <b>0,05</b> | <b>1,87–2,06</b>  |
|                           | 11 years     | 1,98                 | 0,09        | 1,80–2,16          | 2,20         | 0,12        | 1,97–2,44         |
|                           | 12 years     | 1,99                 | 0,09        | 1,81–2,17          | 1,76         | 0,09        | 1,59–1,94         |
|                           | 13 years     | 1,91                 | 0,09        | 1,74–2,08          | 1,90         | 0,11        | 1,68–2,11         |
|                           | 14 years     | 1,84                 | 0,08        | 1,69–1,99          | 1,90         | 0,10        | 1,70–2,10         |
|                           | 15 years     | 1,93                 | 0,07        | 1,78–2,07          | 1,78         | 0,13        | 1,53–2,03         |

|                  |              | KiGGS baseline study |             |                  | KiGGS wave 2 |             |                  |
|------------------|--------------|----------------------|-------------|------------------|--------------|-------------|------------------|
|                  |              | <i>M</i>             | <i>SE</i>   | <i>95 % - CI</i> | <i>M</i>     | <i>SE</i>   | <i>95 % - CI</i> |
|                  | 16 years     | 1,98                 | 0,09        | 1,81–2,15        | 2,08         | 0,11        | 1,86–2,29        |
|                  | 17 years     | 2,07                 | 0,09        | 1,89–2,25        | 2,13         | 0,14        | 1,86–2,41        |
| <b>Peer</b>      | <b>Total</b> | <b>2,01</b>          | <b>0,02</b> | <b>1,97–2,06</b> | <b>2,04</b>  | <b>0,03</b> | <b>1,98–2,10</b> |
| <b>relation-</b> | <b>Girls</b> | <b>2,04</b>          | <b>0,03</b> | <b>1,97–2,11</b> | <b>2,07</b>  | <b>0,04</b> | <b>1,98–2,15</b> |
| <b>ship</b>      | 11 years     | 2,12                 | 0,09        | 1,95–2,28        | 1,88         | 0,12        | 1,65–2,10        |
| <b>problems</b>  | 12 years     | 1,98                 | 0,09        | 1,80–2,16        | 1,64         | 0,08        | 1,48–1,80        |
|                  | 13 years     | 2,00                 | 0,09        | 1,81–2,18        | 1,74         | 0,08        | 1,58–1,91        |
|                  | 14 years     | 2,08                 | 0,09        | 1,90–2,25        | 2,15         | 0,11        | 1,93–2,37        |
|                  | 15 years     | 1,98                 | 0,08        | 1,82–2,14        | 2,23         | 0,11        | 2,02–2,45        |
|                  | 16 years     | 2,02                 | 0,08        | 1,86–2,17        | 2,43         | 0,11        | 2,21–2,64        |
|                  | 17 years     | 2,11                 | 0,08        | 1,95–2,26        | 2,31         | 0,09        | 2,13–2,48        |
|                  | <b>Boys</b>  | <b>1,99</b>          | <b>0,03</b> | <b>1,92–2,05</b> | <b>2,02</b>  | <b>0,04</b> | <b>1,94–2,10</b> |
|                  | 11 years     | 2,08                 | 0,09        | 1,90–2,25        | 2,10         | 0,15        | 1,82–2,39        |
|                  | 12 years     | 2,04                 | 0,09        | 1,87–2,21        | 1,67         | 0,11        | 1,45–1,88        |
|                  | 13 years     | 2,00                 | 0,08        | 1,84–2,16        | 1,97         | 0,11        | 1,75–2,19        |
|                  | 14 years     | 2,07                 | 0,08        | 1,91–2,22        | 2,02         | 0,10        | 1,82–2,21        |
|                  | 15 years     | 1,79                 | 0,07        | 1,65–1,92        | 1,99         | 0,09        | 1,81–2,17        |
|                  | 16 years     | 1,87                 | 0,08        | 1,72–2,03        | 2,08         | 0,09        | 1,90–2,27        |
|                  | 17 years     | 2,09                 | 0,09        | 1,91–2,26        | 2,28         | 0,11        | 2,05–2,51        |
| <b>Conduct</b>   | <b>Total</b> | <b>1,99</b>          | <b>0,02</b> | <b>1,94–2,03</b> | <b>1,65</b>  | <b>0,02</b> | <b>1,60–1,70</b> |
| <b>problems</b>  | <b>Girls</b> | <b>1,90</b>          | <b>0,03</b> | <b>1,85–1,96</b> | <b>1,55</b>  | <b>0,03</b> | <b>1,48–1,61</b> |
|                  | 11 years     | 1,76                 | 0,07        | 1,62–1,90        | 1,72         | 0,10        | 1,53–1,91        |
|                  | 12 years     | 1,82                 | 0,08        | 1,67–1,97        | 1,44         | 0,07        | 1,31–1,57        |
|                  | 13 years     | 1,93                 | 0,07        | 1,79–2,06        | 1,38         | 0,06        | 1,25–1,51        |
|                  | 14 years     | 2,01                 | 0,08        | 1,85–2,16        | 1,71         | 0,10        | 1,52–1,90        |
|                  | 15 years     | 2,00                 | 0,07        | 1,87–2,13        | 1,54         | 0,07        | 1,4–1,68         |
|                  | 16 years     | 1,94                 | 0,08        | 1,77–2,10        | 1,66         | 0,08        | 1,5–1,81         |
|                  | 17 years     | 1,89                 | 0,07        | 1,74–2,03        | 1,38         | 0,08        | 1,23–1,53        |
|                  | <b>Boys</b>  | <b>2,07</b>          | <b>0,03</b> | <b>2,01–2,12</b> | <b>1,75</b>  | <b>0,03</b> | <b>1,68–1,81</b> |
|                  | 11 years     | 1,91                 | 0,07        | 1,76–2,05        | 1,94         | 0,08        | 1,78–2,1         |
|                  | 12 years     | 2,04                 | 0,08        | 1,88–2,2         | 1,71         | 0,09        | 1,53–1,89        |
|                  | 13 years     | 2,07                 | 0,08        | 1,9–2,24         | 1,84         | 0,09        | 1,66–2,03        |
|                  | 14 years     | 1,99                 | 0,08        | 1,84–2,14        | 1,82         | 0,08        | 1,65–1,98        |
|                  | 15 years     | 2,11                 | 0,07        | 1,98–2,25        | 1,72         | 0,08        | 1,56–1,88        |
|                  | 16 years     | 2,15                 | 0,09        | 1,98–2,32        | 1,68         | 0,09        | 1,51–1,85        |

|                                     |              |             |             |                  |             |             |                    |
|-------------------------------------|--------------|-------------|-------------|------------------|-------------|-------------|--------------------|
|                                     | 17 years     | 2,16        | 0,08        | 2,00–2,32        | 1,55        | 0,08        | 1,39–1,72          |
| <b>Hyper-activity/ in-attention</b> | <b>Total</b> | <b>3,62</b> | <b>0,03</b> | <b>3,57–3,68</b> | <b>3,38</b> | <b>0,04</b> | <b>3,31–3,46</b>   |
|                                     | <b>Girls</b> | <b>3,61</b> | <b>0,04</b> | <b>3,54–3,69</b> | <b>3,26</b> | <b>0,05</b> | <b>3,17–3,35</b>   |
|                                     | 11 years     | 3,62        | 0,11        | 3,40–3,84        | 3,72        | 0,16        | 3,41–4,03          |
|                                     | 12 years     | 3,77        | 0,11        | 3,57–3,98        | 3,53        | 0,12        | 3,30–3,77          |
|                                     | 13 years     | 3,77        | 0,12        | 3,53–4,00        | 3,31        | 0,12        | 3,08–3,54          |
|                                     | 14 years     | 3,77        | 0,11        | 3,54–3,99        | 3,33        | 0,13        | 3,08–3,58          |
|                                     | 15 years     | 3,57        | 0,11        | 3,36–3,79        | 3,12        | 0,10        | 2,92–3,33          |
|                                     | 16 years     | 3,43        | 0,11        | 3,21–3,65        | 2,99        | 0,10        | 2,78–3,19          |
|                                     | 17 years     | 3,39        | 0,11        | 3,16–3,61        | 2,94        | 0,12        | 2,69–3,18          |
|                                     | <b>Boys</b>  | <b>3,64</b> | <b>0,04</b> | <b>3,57–3,72</b> | <b>3,50</b> | <b>0,06</b> | <b>3,39 – 3,60</b> |
|                                     | 11 years     | 3,69        | 0,12        | 3,46–3,93        | 4,08        | 0,16        | 3,76–4,39          |
|                                     | 12 years     | 3,85        | 0,12        | 3,61–4,08        | 3,53        | 0,13        | 3,28–3,78          |
|                                     | 13 years     | 3,82        | 0,11        | 3,60–4,03        | 3,78        | 0,14        | 3,51–4,06          |
|                                     | 14 years     | 3,71        | 0,11        | 3,50–3,92        | 3,56        | 0,12        | 3,33–3,79          |
|                                     | 15 years     | 3,55        | 0,10        | 3,36–3,75        | 3,30        | 0,12        | 3,07–3,53          |
|                                     | 16 years     | 3,51        | 0,11        | 3,29–3,73        | 3,20        | 0,13        | 2,94–3,47          |
|                                     | 17 years     | 3,44        | 0,11        | 3,22–3,66        | 3,13        | 0,15        | 2,84–3,42          |
| <b>Prosocial behaviour</b>          | <b>Total</b> | <b>7,75</b> | <b>0,02</b> | <b>7,71–7,80</b> | <b>8,11</b> | <b>0,03</b> | <b>8,05–8,17</b>   |
|                                     | <b>Girls</b> | <b>8,25</b> | <b>0,03</b> | <b>8,19–8,31</b> | <b>8,47</b> | <b>0,04</b> | <b>8,39–8,55</b>   |
|                                     | 11 years     | 8,17        | 0,08        | 8,01–8,32        | 8,69        | 0,09        | 8,50–8,87          |
|                                     | 12 years     | 8,32        | 0,08        | 8,16–8,48        | 8,60        | 0,08        | 8,45–8,76          |
|                                     | 13 years     | 8,19        | 0,08        | 8,05–8,34        | 8,48        | 0,09        | 8,30–8,67          |
|                                     | 14 years     | 8,00        | 0,09        | 7,83–8,18        | 8,19        | 0,10        | 8,00–8,38          |
|                                     | 15 years     | 8,27        | 0,07        | 8,12–8,41        | 8,35        | 0,12        | 8,11–8,58          |
|                                     | 16 years     | 8,37        | 0,08        | 8,21–8,53        | 8,37        | 0,09        | 8,18–8,56          |
|                                     | 17 years     | 8,39        | 0,08        | 8,22–8,55        | 8,66        | 0,09        | 8,48–8,84          |
|                                     | <b>Boys</b>  | <b>7,29</b> | <b>0,03</b> | <b>7,22–7,36</b> | <b>7,76</b> | <b>0,04</b> | <b>7,68–7,84</b>   |
|                                     | 11 years     | 7,50        | 0,10        | 7,31–7,70        | 7,86        | 0,09        | 7,68–8,04          |
|                                     | 12 years     | 7,36        | 0,09        | 7,17–7,54        | 7,91        | 0,12        | 7,68–8,15          |
|                                     | 13 years     | 7,07        | 0,10        | 6,88–7,26        | 7,68        | 0,11        | 7,47–7,89          |
|                                     | 14 years     | 7,08        | 0,09        | 6,91–7,25        | 7,67        | 0,11        | 7,45–7,89          |
|                                     | 15 years     | 7,27        | 0,09        | 7,09–7,46        | 7,52        | 0,12        | 7,28–7,76          |
|                                     | 16 years     | 7,40        | 0,11        | 7,19–7,61        | 7,89        | 0,11        | 7,67–8,11          |
|                                     | 17 years     | 7,35        | 0,10        | 7,15–7,54        | 7,78        | 0,13        | 7,53–8,03          |
